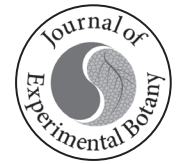

Viewpoint

# Diverse plant viruses: a toolbox for dissection of cellular pathways

Aayushi Shukla, Silvia López-González, Gesa Hoffmann and Anders Hafren\* 

Department of Plant Biology, Uppsala BioCenter, Swedish University of Agricultural Sciences and Linnean Center for Plant Biology, Box 7080, 75007 Uppsala, Sweden

\* Correspondence: [anders.hafren@slu.se](mailto:anders.hafren@slu.se)

**Research in virology has usually focused on one selected host–virus pathosystem to examine the mechanisms underlying a particular disease. However, as exemplified by the mechanistically versatile suppression of antiviral RNA silencing by plant viruses, there may be functionally convergent evolution. Assuming this is a widespread feature, we propose that effector proteins from diverse plant viruses can be a powerful resource for discovering new regulatory mechanisms of distinct cellular pathways. The efficiency of this approach will depend on how deeply and widely the studied pathway is integrated into viral infections. Beyond this, comparative studies using broad virus diversity should increase our global understanding of plant–virus interactions.**

Viruses represent the most numerous and diverse organismal group defined to date (Culley *et al.*, 2007; Paez-Espino *et al.*, 2017) and there are multiple hypotheses speculating that viruses contributed to the origin of cellular life and have a longstanding co-evolutionary history with higher life forms (Durzyńska and Goździcka-Józefiak, 2015; Moreira and López-García, 2015). It is a reasonable assumption that a mutualistic relationship would be the most desired outcome of the tight co-evolutionary relationship between host and virus. While the majority of viruses, including those existing in plants, do not cause disease and are speculated to have a non-harmful relationship with their host plants (Roossinck, 2005, 2015), the scientific literature is clearly dominated by the pathogenic viruses that cause diseases of economic importance (Scholthof *et al.*, 2011). There can be diverse strategies that viruses utilize for pathogenicity, the ability of the virus to cause a disease in its host. Several factors such as horizontal transmission by animal vectors and use of multiple plant species as hosts influence the fitness of the virus in the host population (Froissart *et al.*, 2010; Acosta-Leal *et al.*, 2011; Lancaster and Pfeiffer, 2012; Márquez and Roossinck, 2012). Indeed the

ecological prerequisites driving expansion and diversification of viruses are complex.

## Convergent evolution of viral effector functions

Most, if not all, pathogens have acquired proteins with effector functions, which are defined by their capacity to manipulate host immune responses and resources for the benefit of infection (Mandadi and Scholthof, 2013). Plant viruses have strong potential for rapid evolution (Duffy *et al.*, 2008; Acosta-Leal *et al.*, 2011), driving diversification and the establishment of immense sequence variability. Importantly, plant viruses seem to acquire effector functions in parallel through convergent evolution rather than horizontal gene transfer, as the latter is common for bacterial and fungal pathogens (Kado, 2009; Selin *et al.*, 2016).

The outcome of this convergent effector evolution is nicely exemplified by the most famous and well-studied class of plant viral effectors, the RNA silencing suppressors, that counteract the prominent RNA silencing pathway employed in plant defense (Csorba *et al.*, 2015; Zhao *et al.*, 2016). Here we have observed that plant viruses universally evolved RNA silencing suppressors in a parallel manner. First, the suppressors lack sequence homology and, secondly, they interfere with different steps of this antiviral pathway (Box. 1). Consequently, the identification and mechanistic study of these effectors have contributed to the holistic understanding of the mechanisms and components underlying the RNA silencing pathway in plants. It is plausible that the convergent evolution of RNA silencing suppressors exemplifies a general model of virus effector evolution. Building on this hypothesis, we expect that viruses have together accumulated mechanistically diverse ways to manipulate and exploit different cellular pathways important for infection in plants (García-Ruiz, 2018). Research suggests that these targets are numerous, including autophagy (Dong and Levine, 2013), RNA granules (Poblete-Duran *et al.*,

**Box 1. Diverse virus adaptation to suppress an RNA silencing pathway**

The simplified scheme shows how diversely viruses have adapted to suppress the plant DCL2/DCL4-dependent RNA silencing pathway. This illustrates how plant viruses have undergone convergent evolution to suppress the function of this pathway, with the general aim of reducing the antiviral RNA-induced silencing complex (RISC), which is achieved via both common and distinct strategies/interaction points. We expect that the virome could co-evolve similarly with any plant pathway that has a central role in infection and thus consider it as a potential toolbox for studying such pathways. This simplified illustration is based on information from a review on viral RNA silencing suppressors (Csorba *et al.*, 2015).

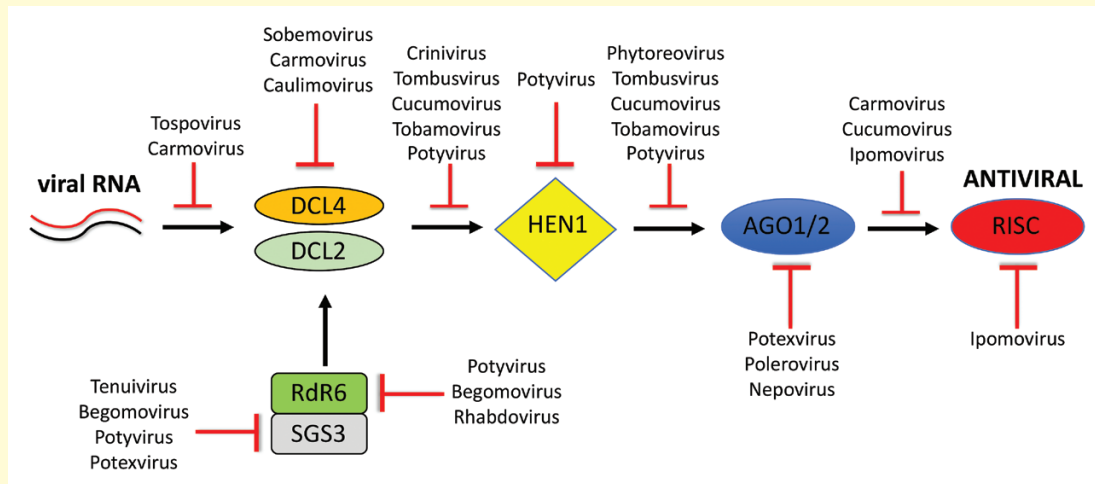

2016), translational regulation (Zorzatto *et al.*, 2015), the ubiquitin–proteasome system (Verchot, 2016a), the unfolded protein response (Verchot, 2016b), lipid metabolism (Strating and van Kuppeveld, 2017), phytohormones (Collum and Culver, 2016), vesicular trafficking (Laliberté and Zheng, 2014; Pitzalis and Heinlein, 2017), macromolecular transport between cells (Heinlein, 2015; Kumar *et al.*, 2015), and major developmental pathways including flowering (Cecchini *et al.*, 2002). All these infection targets are also linked to plant defense responses. This lays the groundwork for using diverse virus effectors as a resource for mechanistic and functional studies of such pathways both within and outside an infection context.

**Arabidopsis: a powerful model**

For the vast majority of plant species, the currently known and available viruses that are capable of a compatible infection are limited. How many different viral species can we expect to infect a single host species? Humans are probably the best surveyed species, with a recent estimate of well over 200 infecting viral species (Woolhouse *et al.*, 2012). Considering the short time period for which *Arabidopsis thaliana* (Arabidopsis) has been used as a plant model in virology (Pagán *et al.*, 2010; Ouibrahim and Caranta, 2013), an impressive number of viruses have already been found to infect this plant, with at least 46 different species spanning 16 genera (Table 1). For many viral species, there are several known strains that further expand this diversity, not least because they frequently show large variations in the severity of disease (Cecchini *et al.*, 1998). This

enables broad virus diversity and comparative virology studies in the resource-rich model plant *Arabidopsis*. Owing to broad virus diversity, additional plant models such as tomato, cucumber, lettuce, potato, melon, pepper, and rice could all be considered (Hanssen *et al.*, 2010). The diverse viruses infecting a single host can be exploited to understand pertinent cellular pathways. If using well-established heterologous systems such as *Nicotiana benthamiana* for screening viral effector proteins without a prerequisite for infection of a specific host, the available virus diversity becomes practically unlimited.

**Diverse viruses to dissect selected pathways**

The efficiency of a virus diversity approach increases with the overall number of viruses targeting a specific pathway. How globally a selected pathway is integrated into virus infections usually becomes clear in retrospect when enough examples have emerged. However, animal viruses have been studied much more extensively than plant viruses and may therefore provide clear hints as to which cellular pathways could be approached through virus diversity in plants. An example of such a pathway is autophagy, which has so far been shown to function in >50 different animal virus infections, with roles ranging from different antiviral immune responses to direct support for infection (Dong and Levine, 2013). Importantly, animal viruses commonly manipulate different regulatory nodes of the autophagy pathway, transforming them into a potential resource for functional dissection of the pathway.

**Table 1.** List showing viruses that infect *Arabidopsis thaliana Col-0*

| Genus         | Species                                     | Reference                              |
|---------------|---------------------------------------------|----------------------------------------|
| Alfavirus     | Alfalfa mosaic virus                        | Balasubramaniam <i>et al.</i> (2006)   |
| Begomovirus   | Cabbage leaf curl virus                     | Hill <i>et al.</i> (1998)              |
|               | Cleome leaf crumple virus                   | Paprotka <i>et al.</i> (2010)          |
|               | Euphorbia mosaic virus                      | Paprotka <i>et al.</i> (2010)          |
|               | Sri Lankan cassava mosaic virus             | Mittal <i>et al.</i> (2008)            |
|               | Tomato yellow leaf curl virus               | Sade <i>et al.</i> (2014)              |
|               | South African cassava mosaic virus          | Pierce and Rey (2013)                  |
| Bromovirus    | Brome mosaic virus                          | Dzianott and Bujarski (2004)           |
|               | Cassia yellow blotch virus                  | Iwahashi <i>et al.</i> (2005)          |
|               | Cowpea chlorotic mottle virus               | Fujisaki <i>et al.</i> (2003)          |
|               | Spring beauty latent virus                  | Iwahashi <i>et al.</i> (2005)          |
| Carmovirus    | Cardamine chlorotic fleck virus             | Skotnicki <i>et al.</i> (1993)         |
|               | Turnip crinkle virus                        | Li and Simon (1990)                    |
| Caulimovirus  | Cauliflower mosaic virus                    | Melcher (1989)                         |
| Cheravirus    | Apple latent spherical virus                | Igarashi <i>et al.</i> (2009)          |
| Cilevirus     | Citrus leprosis virus C                     | Arena <i>et al.</i> (2013)             |
|               | <i>Solanum violaeifolium</i> ringspot virus | Arena <i>et al.</i> (2017)             |
| Comovirus     | Turnip ringspot virus                       | Rajakaruna <i>et al.</i> (2007)        |
| Cucumovirus   | Cucumber mosaic virus                       | Takahashi <i>et al.</i> (1994)         |
| Curtovirus    | Beet curly top virus                        | Lee <i>et al.</i> (1994)               |
|               | Beet severe curly top virus                 | Lee <i>et al.</i> (1994)               |
|               | Spinach curly top virus                     | Baliji <i>et al.</i> (2007)            |
| Dichorhavirus | Clerodendrum chlorotic spot virus           | Arena <i>et al.</i> (2017)             |
|               | Coffee ringspot virus                       | Arena <i>et al.</i> (2017)             |
| Nanovirus     | Faba bean necrotic yellow virus             | Vega-Arreguín <i>et al.</i> (2007)     |
| Nepovirus     | Arabis mosaic virus                         | Martinez-Herrera <i>et al.</i> (1994)  |
|               | Cherry leaf roll virus                      | Rumbou <i>et al.</i> (2009)            |
|               | Tobacco ringspot virus                      | Lee <i>et al.</i> (1996)               |
|               | Tomato spotted wilt virus                   | German <i>et al.</i> (1995)            |
| Polerovirus   | Beet mild yellowing virus                   | Stevens <i>et al.</i> (2005)           |
|               | Beet western yellows virus                  | Bortolamiol <i>et al.</i> (2007)       |
|               | Turnip yellows virus                        | Stevens <i>et al.</i> (2005)           |
| Potexvirus    | <i>Plantago asiatica</i> mosaic virus       | Yamaji <i>et al.</i> (2012)            |
| Potyvirus     | Lettuce mosaic virus                        | Revers <i>et al.</i> (2003)            |
|               | Plum pox virus                              | Decroocq <i>et al.</i> (2006)          |
|               | Tobacco etch virus                          | Contreras-Paredes <i>et al.</i> (2013) |
|               | Turnip mosaic virus                         | Martinez-Herrera <i>et al.</i> (1994)  |
|               | Watermelon mosaic virus                     | Ouibrahim <i>et al.</i> (2014)         |
| Sobemovirus   | Turnip rosette virus                        | Callaway <i>et al.</i> (2004)          |
| Tobamovirus   | Oilseed rape mosaic virus                   | Aguilar <i>et al.</i> (1996)           |
|               | Tobacco mosaic virus                        | Ishikawa <i>et al.</i> (1991)          |
|               | Turnip vein clearing virus                  | Lartey <i>et al.</i> (1997)            |
| Tobravirus    | Pepper ringspot virus                       | Jaubert <i>et al.</i> (2011)           |
|               | Tobacco rattle virus                        | Donaire <i>et al.</i> (2008)           |
| Tospovirus    | Iris yellow spot virus                      | Naveed and Pappu (2012)                |
| Tymovirus     | Turnip yellow mosaic virus                  | Martinez-Herrera <i>et al.</i> (1994)  |

It is only recently that discoveries of autophagy in plant virus infections have been made, including an ssDNA virus (Haxim *et al.*, 2017), a dsDNA virus (Hafren *et al.*, 2017), and three ssRNA viruses (Hafren *et al.*, 2018; Yang *et al.*, 2018). These few examples already imply global integration of autophagy in plant virus infections, identifying mechanisms involved in inhibition of autophagy by viral proteins, viral protein interaction with autophagy components, viral component degradation by autophagy, and more generally that autophagy has both antiviral and proviral functions in plant virus epidemiology. According to our point of view, we predict that

a systematic application of diverse viruses could be used to identify a plethora of autophagy-based mechanisms that are activated and manipulated by viruses, thereby broadening our understanding of the plant autophagy pathway *per se* and its diverse roles in viral pathogenesis. RNA granules is yet another infection point we consider promising to study further using virus diversity, owing to their broad incorporation into animal virus infections (Poblete-Duran *et al.*, 2016) and also the intriguing connections that slowly accumulate for plant viruses (Beckham *et al.*, 2007; Hafren *et al.*, 2015; Ma *et al.*, 2015; Ye *et al.*, 2015; Meteignier *et al.*, 2016; Krapp *et al.*, 2017).

What potential advantages and complements do this approach bring compared with others such as *Arabidopsis* forward genetics? First and as already discussed in connection with the virome interaction with the RNA silencing pathway (Box 1), convergent evolution of the different viruses will result in the identification of different regulatory nodes of complex pathways. Secondly, if we are dealing with cellular pathways and functions that show no growth phenotypes when disrupted and cell biological phenotyping is required, the screening of a virome using such phenotyping platforms is simple compared with a forward genetics screen. This could hold especially true in the absence of an automated high-throughput platform for forward genetics. Thirdly, if the deletion of a pathway component is lethal for plants, it can still be manipulated by viruses without too severe growth phenotypes. One example is provided by the RNA granule pathways that can show quantitative phenotypes during plant virus infections (Hafrén *et al.*, 2015), and seedling lethality when knocked out (Xu and Chua, 2011). Another interesting approach will be examining plant pathways that are not globally conserved, but rather between monocot and dicot plants or even solely in between clades (e.g. glucosinolates in Brassicaceae) and how these pathways are altered by viruses capable of infection.

## Concluding remarks

Molecular and cell biology-based virology continues to reveal fundamental mechanisms of cellular pathways both within and outside an infection context. Evidently, in many cases, these discoveries have arisen through the mechanistic dissection of viral effector protein manipulations of the host cell. In accordance with the central hypothesis of this viewpoint that viruses acquire effector protein functions through functionally convergent evolution and presuming that convergent evolution successfully equipped diverse viruses with effectors targeting a specific pathway, as observed for RNA silencing, these effectors should provide a unique tool for its mechanistic study. Based on the discussion above, we propose that a prominent resource could be an expression library that consists of proteins from a wide and comprehensive plant virus diversity to be used for screening pathway phenotypes as a starting point to identify pathway regulators. In parallel, this could systematically evaluate the phenomenon of virus effector convergent evolution.

## Acknowledgements

Funding from the Swedish Research Councils VR and FORMAS, as well as the Carl Tryggers Foundation for AH is acknowledged.

## References

- Acosta-Leal R, Duffy S, Xiong Z, Hammond RW, Elena SF. 2011. Advances in plant virus evolution: translating evolutionary insights into better disease management. *Phytopathology* **101**, 1136–1148.
- Aguilar I, Sánchez F, Martín Martín A, Martínez-Herrera D, Ponz F. 1996. Nucleotide sequence of Chinese rape mosaic virus (oilseed rape mosaic virus), a crucifer tobamovirus infectious on *Arabidopsis thaliana*. *Plant Molecular Biology* **30**, 191–197.
- Arena GD, Bergamini MP, Tassi AD, Kitajima EW, Kubo KS, Freitas-Astúa J. 2013. *Citrus leprosis virus C* infects *Arabidopsis thaliana*, the model for plant–pathogen interactions. *Journal of Plant Pathology* **95**, 448.
- Arena GD, Ramos-González PL, Nunes MA, Jesus CC, Calegario RF, Kitajima EW, Valdenice MN, Freitas-Astúa J. 2017. *Arabidopsis thaliana* as a model host for *Brevipalpus* mite-transmitted viruses. *Scientia Agricola* **74**, 85–89.
- Balasubramaniam M, Ibrahim A, Kim BS, Loesch-Fries LS. 2006. *Arabidopsis thaliana* is an asymptomatic host of *Alfalfa mosaic virus*. *Virus Research* **121**, 215–219.
- Baliji S, Sunter J, Sunter G. 2007. Transcriptional analysis of complementary sense genes in *Spinach curly top virus* and functional role of C2 in pathogenesis. *Molecular Plant-Microbe Interactions* **20**, 194–206.
- Beckham CJ, Light HR, Nissan TA, Ahlquist P, Parker R, Noueiry A. 2007. Interactions between brome mosaic virus RNAs and cytoplasmic processing bodies. *Journal of Virology* **81**, 9759–9768.
- Bortolamiol D, Pashouhandeh M, Marrocco K, Genschik P, Ziegler-Graff V. 2007. The Polerovirus F box protein P0 targets ARGONAUTE1 to suppress RNA silencing. *Current Biology* **17**, 1615–1621.
- Callaway AS, George CG, Lommel SA. 2004. A *Sobemovirus* coat protein gene complements long-distance movement of a coat protein-null *Dianthovirus*. *Virology* **330**, 186–195.
- Cecchini E, Al-Kaff NS, Bannister A, Giannakou ME, McCallum DG, Maule AJ, Milner JJ, Covey SN. 1998. Pathogenic interactions between variants of cauliflower mosaic virus and *Arabidopsis thaliana*. *Journal of Experimental Botany* **49**, 731–737.
- Cecchini E, Geri C, Love AJ, Coupland G, Covey SN, Milner JJ. 2002. Mutations that delay flowering in *Arabidopsis* de-couple symptom response from cauliflower mosaic virus accumulation during infection. *Molecular Plant Pathology* **3**, 81–90.
- Collum TD, Culver JN. 2016. The impact of phytohormones on virus infection and disease. *Current Opinion in Virology* **17**, 25–31.
- Contreras-Paredes CA, Silva-Rosales L, Daròs JA, Alejandri-Ramírez ND, Dinkova TD. 2013. The absence of eukaryotic initiation factor eIF(iso)4E affects the systemic spread of a *Tobacco etch virus* isolate in *Arabidopsis thaliana*. *Molecular Plant-Microbe Interactions* **26**, 461–470.
- Csorba T, Kontra L, Burgyán J. 2015. Viral silencing suppressors: tools forged to fine-tune host–pathogen coexistence. *Virology* **479–480**, 85–103.
- Culley AI, Lang AS, Suttle CA. 2007. The complete genomes of three viruses assembled from shotgun libraries of marine RNA virus communities. *Virology Journal* **4**, 69.
- Decroocq V, Sicard O, Alamillo JM, Lansac M, Eyquard JP, García JA, Candresse T, Le Gall O, Revers F. 2006. Multiple resistance traits control *Plum pox virus* infection in *Arabidopsis thaliana*. *Molecular Plant-Microbe Interactions* **19**, 541–549.
- Donaire L, Barajas D, Martínez-García B, Martínez-Priego L, Pagán I, Llave C. 2008. Structural and genetic requirements for the biogenesis of *Tobacco rattle virus*-derived small interfering RNAs. *Journal of Virology* **82**, 5167–5177.
- Dong X, Levine B. 2013. Autophagy and viruses: adversaries or allies? *Journal of Innate Immunity* **5**, 480–493.
- Duffy S, Shackelton LA, Holmes EC. 2008. Rates of evolutionary change in viruses: patterns and determinants. *Nature Reviews. Genetics* **9**, 267–276.
- Durzyńska J, Goździcka-Józefiak A. 2015. Viruses and cells intertwined since the dawn of evolution. *Virology Journal* **12**, 169.
- Dzianott A, Bujarski JJ. 2004. Infection and RNA recombination of Brome mosaic virus in *Arabidopsis thaliana*. *Virology* **318**, 482–492.
- Froissart R, Doumayrou J, Vuillaume F, Alizon S, Michalakakis Y. 2010. The virulence–transmission trade-off in vector-borne plant viruses: a review of (non-)existing studies. *Philosophical Transactions of the Royal Society B: Biological Sciences* **365**, 1907–1918.
- Fujisaki K, Hagihara F, Kaido M, Mise K, Okuno T. 2003. Complete nucleotide sequence of spring beauty latent virus, a bromovirus infectious to *Arabidopsis thaliana*. *Archives of Virology* **148**, 165–175.

- García-Ruiz H.** 2018. Susceptibility genes to plant viruses. *Viruses* **10**, 484.
- German TL, Adkins S, Witherell A, Richmond KE, Knaack WR, Willis DK.** 1995. Infection of *Arabidopsis thaliana* ecotype Columbia by tomato spotted wilt virus. *Plant Molecular Biology Report* **13**, 110–117.
- Hafrén A, Löhmus A, Mäkinen K.** 2015. Formation of *Potato virus A*-induced RNA granules and viral translation are interrelated processes required for optimal virus accumulation. *PLoS Pathogens* **11**, e1005314.
- Hafrén A, Macia JL, Love AJ, Milner JJ, Drucker M, Hofius D.** 2017. Selective autophagy limits cauliflower mosaic virus infection by NBR1-mediated targeting of viral capsid protein and particles. *Proceedings of the National Academy of Sciences, USA* **114**, E2026–E2035.
- Hafrén A, Üstün S, Hochmuth A, Svenning S, Johansen T, Hofius D.** 2018. Turnip mosaic virus counteracts selective autophagy of the viral silencing suppressor HCpro. *Plant Physiology* **176**, 649–662.
- Hanssen IM, Lapidot M, Thomma BP.** 2010. Emerging viral diseases of tomato crops. *Molecular Plant-Microbe Interactions* **23**, 539–548.
- Haxim Y, Ismayil A, Jia Q, et al.** 2017. Autophagy functions as an antiviral mechanism against geminiviruses in plants. *eLife* **6**, e23897.
- Heinlein M.** 2015. Plasmodesmata: channels for viruses on the move. *Methods in Molecular Biology* **1217**, 25–52.
- Hill JE, Strandberg JO, Hiebert E, Lazarowitz SG.** 1998. Asymmetric infectivity of pseudorecombinants of cabbage leaf curl virus and squash leaf curl virus: implications for bipartite geminivirus evolution and movement. *Virology* **250**, 283–292.
- Igarashi A, Yamagata K, Sugai T, et al.** 2009. *Apple latent spherical virus* vectors for reliable and effective virus-induced gene silencing among a broad range of plants including tobacco, tomato, *Arabidopsis thaliana*, cucurbits, and legumes. *Virology* **386**, 407–416.
- Ishikawa M, Obata F, Kumagai T, Ohno T.** 1991. Isolation of mutants of *Arabidopsis thaliana* in which accumulation of tobacco mosaic virus coat protein is reduced to low levels. *Molecular & General Genetics* **230**, 33–38.
- Iwahashi F, Fujisaki K, Kaido M, Okuno T, Mise K.** 2005. Synthesis of infectious in vitro transcripts from *Cassia yellow blotch bromovirus* cDNA clones and a reassortment analysis with other bromoviruses in protoplasts. *Archives of Virology* **150**, 1301–1314.
- Jaubert M, Bhattacharjee S, Mello AF, Perry KL, Moffett P.** 2011. ARGONAUTE2 mediates RNA-silencing antiviral defenses against *Potato virus X* in *Arabidopsis*. *Plant Physiology* **156**, 1556–1564.
- Kado CI.** 2009. Horizontal gene transfer: sustaining pathogenicity and optimizing host–pathogen interactions. *Molecular Plant Pathology* **10**, 143–150.
- Krapp S, Greiner E, Amin B, Sonnewald U, Krenz B.** 2017. The stress granule component G3BP is a novel interaction partner for the nuclear shuttle proteins of the nanovirus pea necrotic yellow dwarf virus and geminivirus abutilon mosaic virus. *Virus Research* **227**, 6–14.
- Kumar D, Kumar R, Hyun TK, Kim JY.** 2015. Cell-to-cell movement of viruses via plasmodesmata. *Journal of Plant Research* **128**, 37–47.
- Laliberté JF, Zheng H.** 2014. Viral manipulation of plant host membranes. *Annual Review of Virology* **1**, 237–259.
- Lancaster KZ, Pfeiffer JK.** 2012. Viral population dynamics and virulence thresholds. *Current Opinion in Microbiology* **15**, 525–530.
- Lartey R, Ghoshroy S, Ho J, Citovsky V.** 1997. Movement and subcellular localization of a tobamovirus in *Arabidopsis*. *The Plant Journal* **12**, 537–545.
- Lee JM, Hartman GL, Domier LL, Bent AF.** 1996. Identification and map location of TTR1, a single locus in *Arabidopsis thaliana* that confers tolerance to tobacco ringspot nepovirus. *Molecular Plant-Microbe Interactions* **9**, 729–735.
- Lee S, Stenger DC, Bisaro DM, Davis KR.** 1994. Identification of loci in *Arabidopsis* that confer resistance to geminivirus infection. *The Plant Journal* **6**, 525–535.
- Li XH, Simon AE.** 1990. Symptom intensification on cruciferous hosts by the virulent satellite RNA of Turnip crinkle virus. *Phytopathology*, **80**, 238–242.
- Ma X, Nicole MC, Metegnier LV, Hong N, Wang G, Moffett P.** 2015. Different roles for RNA silencing and RNA processing components in virus recovery and virus-induced gene silencing in plants. *Journal of Experimental Botany* **66**, 919–932.
- Mandadi KK, Scholthof KB.** 2013. Plant immune responses against viruses: how does a virus cause disease? *The Plant Cell* **25**, 1489–1505.
- Márquez LM, Roossinck MJ.** 2012. Do persistent RNA viruses fit the trade-off hypothesis of virulence evolution? *Current Opinion in Virology* **2**, 556–560.
- Martinez-Herrera D, Romero J, Martinez-Zapater JM, Ponz F.** 1994. Suitability of *Arabidopsis thaliana* as a system for the study of plant–virus interactions. *Fitopatología* **29**, 132–136.
- Melcher U.** 1989. Symptoms of Cauliflower mosaic virus infection in *Arabidopsis thaliana* and turnip. *Botanical Gazette*. **150**, 139–147.
- Metegnier LV, Zhou J, Cohen M, Bhattacharjee S, Brosseau C, Chan MG, Robatzek S, Moffett P.** 2016. NB-LRR signaling induces translational repression of viral transcripts and the formation of RNA processing bodies through mechanisms differing from those activated by UV stress and RNAi. *Journal of Experimental Botany* **67**, 2353–2366.
- Mittal D, Borah BK, Dasgupta I.** 2008. Agroinfection of cloned Sri Lankan cassava mosaic virus DNA to *Arabidopsis thaliana*, *Nicotiana tabacum* and cassava. *Archives of Virology* **153**, 2149–2155.
- Moreira D, López-García P.** 2015. Evolution of viruses and cells: do we need a fourth domain of life to explain the origin of eukaryotes? *Philosophical Transactions of the Royal Society B: Biological Sciences* **370**, 20140327.
- Naveed K, Pappu HR.** 2012. Susceptibility of *Arabidopsis* ecotypes to infection by *Iris yellow spot virus*. Online. *Plant Health Progress* doi:10.1094/PHP-2012-0714-01-RS.
- Ouibrahim L, Caranta C.** 2013. Exploitation of natural genetic diversity to study plant–virus interactions: what can we learn from *Arabidopsis thaliana*? *Molecular Plant Pathology* **14**, 844–854.
- Ouibrahim L, Mazier M, Estevan J, Pagny G, Decroocq V, Desbiez C, Moretti A, Gallois JL, Caranta C.** 2014. Cloning of the *Arabidopsis rwm1* gene for resistance to *Watermelon mosaic virus* points to a new function for natural virus resistance genes. *The Plant Journal* **79**, 705–716.
- Paez-Espino D, Pavlopoulos GA, Ivanova NN, Kyripides NC.** 2017. Nontargeted virus sequence discovery pipeline and virus clustering for metagenomic data. *Nature Protocols* **12**, 1673–1682.
- Pagán I, Fraile A, Fernandez-Fueyo E, Montes N, Alonso-Blanco C, García-Arenal F.** 2010. *Arabidopsis thaliana* as a model for the study of plant–virus co-evolution. *Philosophical Transactions of the Royal Society B: Biological Sciences* **365**, 1983–1995.
- Paprotka T, Metzler V, Jeske H.** 2010. The first DNA 1-like alpha satellites in association with New World begomoviruses in natural infections. *Virology* **404**, 148–157.
- Pierce EJ, Rey ME.** 2013. Assessing global transcriptome changes in response to *South African cassava mosaic virus* [ZA-99] infection in susceptible *Arabidopsis thaliana*. *PLoS One* **8**, e67534.
- Pitzalis N, Heinlein M.** 2017. The roles of membranes and associated cytoskeleton in plant virus replication and cell-to-cell movement. *Journal of Experimental Botany* **69**, 117–132.
- Poblete-Duran N, Prades-Perez Y, Vera-Otarola J, Soto-Rifo R, Valiente-Echeverría F.** 2016. Who regulates whom? An overview of RNA granules and viral infections. *Viruses* **8**, 180.
- Rajakaruna P, Khandekar S, Meulia T, Leisner SM.** 2007. Identification and host relations of Turnip ringspot virus, a novel Comovirus from Ohio. *Plant Disease* **91**, 1212–1220.
- Revers F, Guiraud T, Houvenaghel MC, Mauduit T, Le Gall O, Candresse T.** 2003. Multiple resistance phenotypes to *Lettuce mosaic virus* among *Arabidopsis thaliana* accessions. *Molecular Plant-Microbe Interactions* **16**, 608–616.
- Roossinck MJ.** 2005. Symbiosis versus competition in plant virus evolution. *Nature Reviews. Microbiology* **3**, 917–924.
- Roossinck MJ.** 2015. Plants, viruses and the environment: ecology and mutualism. *Virology* **479–480**, 271–277.
- Rumbou A, von Barga S, Buttner C.** 2009. A model system for plant–virus interaction—inefectivity and seed transmission of *Cherry leaf roll virus* (CLR) in *Arabidopsis thaliana*. *European Journal of Plant Pathology* **124**, 527–532.
- Sade D, Sade N, Shriki O, et al.** 2014. Water balance, hormone homeostasis, and sugar signaling are all involved in tomato resistance to *Tomato yellow leaf curl virus*. *Plant Physiology* **165**, 1684–1697.
- Scholthof KB, Adkins S, Czosnek H, et al.** 2011. Top 10 plant viruses in molecular plant pathology. *Molecular Plant Pathology* **12**, 938–954.

- Selin C, de Kievit TR, Belmonte MF, Fernando WG.** 2016. Elucidating the role of effectors in plant–fungal interactions: progress and challenges. *Frontiers in Microbiology* **7**, 600.
- Skotnicki ML, Mackenzie AM, Torronen M, Gibbs AJ.** 1993. The genomic sequence of cardamine chlorotic fleck carmovirus. *Journal of General Virology* **74**, 1933–1937.
- Stevens M, Freeman B, Liu HY, Herrbach E, Lemaire O.** 2005. Beet poleroviruses: close friends or distant relatives? *Molecular Plant Pathology* **6**, 1–9.
- Strating JR, van Kuppeveld FJ.** 2017. Viral rewiring of cellular lipid metabolism to create membranous replication compartments. *Current Opinion in Cell Biology* **47**, 24–33.
- Takahashi H, Goto N, Ehara Y.** 1994. Hypersensitive response in cucumber mosaic virus-inoculated *Arabidopsis thaliana*. *The Plant Journal* **6**, 369–377.
- Vega-Arreguín JC, Gronenborn B, Ramírez BC.** 2007. *Arabidopsis thaliana* is a host of the legume nanovirus Faba bean necrotic yellows virus. *Virus Research* **128**, 81–87.
- Verchot J.** 2016a. Plant virus infection and the ubiquitin proteasome machinery: arms race along the endoplasmic reticulum. *Viruses* **8**, 314.
- Verchot J.** 2016b. How does the stressed out ER find relief during virus infection? *Current Opinion in Virology* **17**, 74–79.
- Weigel D.** 2012. Natural variation in Arabidopsis: from molecular genetics to ecological genomics. *Plant Physiology* **158**, 2–22.
- Woolhouse M, Scott F, Hudson Z, Howey R, Chase-Topping M.** 2012. Human viruses: discovery and emergence. *Philosophical Transactions of the Royal Society B: Biological Sciences* **367**, 2864–2871.
- Xu J, Chua NH.** 2011. Processing bodies and plant development. *Current Opinion in Plant Biology* **14**, 88–93.
- Yamaji Y, Maejima K, Ozeki J, et al.** 2012. Lectin-mediated resistance impairs plant virus infection at the cellular level. *The Plant Cell* **24**, 778–793.
- Yang M, Zhang Y, Xie X, Yue N, Li J, Wang XB, Han C, Yu J, Liu Y, Li D.** 2018. *Barley stripe mosaic virus* yb protein subverts autophagy to promote viral infection by disrupting the ATG7–ATG8 interaction. *The Plant Cell* **30**, 1582–1595.
- Ye J, Yang J, Sun Y, Zhao P, Gao S, Jung C, Qu J, Fang R, Chua NH.** 2015. Geminivirus activates ASYMMETRIC LEAVES 2 to accelerate cytoplasmic DCP2-mediated mRNA turnover and weakens RNA silencing in Arabidopsis. *PLoS Pathogens* **11**, e1005196.
- Zhao JH, Hua CL, Fang YY, Guo HS.** 2016. The dual edge of RNA silencing suppressors in the virus–host interactions. *Current Opinion in Virology* **17**, 39–44.
- Zorzatto C, Machado JP, Lopes KV, et al.** 2015. NIK1-mediated translation suppression functions as a plant antiviral immunity mechanism. *Nature* **520**, 679–682.
